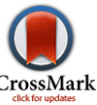

## Correction

# Correction: Ten-Year Trends in Coronary Calcification in Individuals without Clinical Cardiovascular Disease in the Multi-Ethnic Study of Atherosclerosis

## The PLOS ONE Staff

The following information is missing from the Funding section: This research was supported by contracts N01-HC-95159, N01-HC-95160, N01-HC-95161, N01-HC-95162, N01-HC-95163, N01-HC-95164, N01-HC-95165, N01-HC-95166, and N01-HC-95169 from the National Heart, Lung, and Blood Institute, by grants UL1-TR-000040 and UL1-RR-025005 from NCCR, and by grant RD831697 (MESA Air) from the U.S Environmental Protection Agency.

## Reference

1. Bild DE, McClelland R, Kaufman JD, Blumenthal R, Burke GL, et al. (2014) Ten-Year Trends in Coronary Calcification in Individuals without Clinical Cardiovascular Disease in the Multi-Ethnic Study of Atherosclerosis. PLoS ONE 9(4): e94916. doi:10.1371/journal.pone.0094916

**Citation:** The PLOS ONE Staff (2014) Correction: Ten-Year Trends in Coronary Calcification in Individuals without Clinical Cardiovascular Disease in the Multi-Ethnic Study of Atherosclerosis. PLoS ONE 9(7): e103666. doi:10.1371/journal.pone.0103666

**Published:** July 21, 2014

**Copyright:** © 2014 The PLOS ONE Staff. This is an open-access article distributed under the terms of the Creative Commons Attribution License, which permits unrestricted use, distribution, and reproduction in any medium, provided the original author and source are credited.
